# Supplementary material
Source: Research Square preprint supplement (doi:10.21203/rs.3.rs-8636712/v1)
Supplement: Supplementary file 1 [file e994e15451c934331fcba1c3.docx]

Table S1. Responses to questions of mid process evaluation asking whether participants experienced each intervention (N = 31).

| Questions | Yes (%) |
| --- | --- |
| 1. Did you see the LTPA-related posts on the Facebook page? | 30 (96.8) |
| 2. Did you see other participants' posts in the Facebook group? | 27 (87.1) |
| 3. Did you post your weekly LTPA goals in the Facebook group? | 20 (64.5) |
| 4. Did you log your exercise to achieve your weekly LTPA goals in the Facebook group? | 20 (64.5) |
| 5. Did you receive messages related to the NFTF-LTPA promotion program? | 31 (100.0) |

Table S2. Responses to questions of post process evaluation asking whether participants experienced each intervention (N = 30).

| Questions | Yes (%) |
| --- | --- |
| 1. Did you see the LTPA-related posts on the Facebook page? | 28 (93.3) |
| 2. Did you read the LTPA-related posts on the Facebook page in detail? | 18 (60.0) |
| 3. Did you see other participants' posts in the Facebook group? | 90 (76.7) |
| 4. Did you post your weekly LTPA goals in the Facebook group? | 17 (56.7) |
| 5. Did you log your exercise to achieve your weekly LTPA goals in the Facebook group? | 18 (60.0) |
| 6. Did you receive messages related to the NFTF-LTPA promotion program? | 29 (96.7) |
| 7. Did you see the 'LTPA participation tips' posts by OOO and OOO in the Facebook page and group? | 16 (53.3) |
| 8. Did you read the 'LTPA participation tips' posts by OOO and OOO in detail? | 12 (40.0) |

Table S3. Responses to questions of process evaluation asking whether interventions were implemented as planned (N = 3).

| Item | Mean (SD) |
| --- | --- |
| *Facebook Page* |  |
| 1. Was the number of posts on the page appropriate? | 4.00 (0.00) |
| 2. Did the participants carefully read the posts provided on the page? | 3.00 (1.00) |
| 3. Did the participants like the posts on the page? | 2.30 (0.58) |
| *Facebook Groups* |  |
| 1. Did the researcher provide a detailed explanation about group activities related to LTPA participation? | 4.00 (0.00) |
| 2. Did the researcher provide feedback on the participants' posts? | 4.00 (0.00) |
| 3. Was the number of participants in the group appropriate? | 4.00 (0.00) |
| 4. Did the participants fully understand group activities? | 3.30 (0.58) |
| 5. Did the participants actively engage in the group activities? | 2.00 (2.00) |
| *Messages* |  |
| 1. Was the number of messages related to interventions appropriate? | 4.00 (0.00) |
| 2. Did the participants carefully read the messages? | 3.00 (1.00) |
